# Assessing the impact of temperature and humidity exposures during early infection stages on case-fatality of COVID-19: a modelling study in Europe

Jingbo Liang<sup>a</sup>, Hsiang-Yu Yuan<sup>a,b,\*</sup>

<sup>a</sup>*Department of Biomedical Sciences, Jockey Club College of Veterinary Medicine and Life Sciences, City University of Hong Kong, Hong Kong*

<sup>b</sup>*Centre for Applied One Health Research and Policy Advice, City University of Hong Kong, Hong Kong*

---

## Abstract

**Background** Although associations between key weather indicators (i.e. temperature and humidity) and COVID-19 mortality has been reported, the relationship between these exposures among different timing in early infection stages (from virus exposure up to a few days after symptom onset) and the probability of death after infection (also called case fatality rate, CFR) has yet to be determined.

**Methods** We estimated the instantaneous CFR of eight European countries using Bayesian inference in conjunction with stochastic transmission models, taking account of delays in reporting the number of newly confirmed cases and deaths. The exposure-lag-response associations between fatality rate and weather conditions to which patients were exposed at different timing were obtained using distributed lag nonlinear models coupled with mixed-effect models.

**Results** Our results showed that the Odds Ratio (OR) of death is negatively associated with the temperature, with two maxima (OR=1.29 (95% CI: 1.23, 1.35) at -0.1°C; OR=1.12 (95% CI: 1.08, 1.16) at 0.1°C) occurred at the time of virus exposure and after symptom onset. Two minima (OR=0.81 (95% CI: 0.71, 0.92) at 23.2°C; OR=0.71 (95% CI: 0.63, 0.80) at 21.7°C) also occurred at these two distinct periods correspondingly. Low humidity (below 50%) during the early stages and high humidity (approximately 89%) after symptom onset were related to the lower fatality.

**Conclusion** Environmental conditions may affect not only the initial viral load when exposure to viruses but also individuals' immunity response around symptom onset. Warmer temperatures and

---

\*Corresponding author  
Email address: [sean.yuan@cityu.edu.hk](mailto:sean.yuan@cityu.edu.hk) (Hsiang-Yu Yuan)

higher humidity after symptom onset were related to the lower fatality.

*Keywords:* Case fatality rate, Temperature, Humidity, Symptom onset, Immunity response,

*2022 MSC:* 12-17, 99-00

---

#### Highlights

- Temperature and humidity conditions that patients were exposed to during their early infection stages were associated with COVID-19 case fatality rate.
- Warmer temperatures ( $> 20^{\circ}\text{C}$ ) at infection time or after symptom onset, but not during the incubation period, were associated with lower death risk. Low relative humidity ( $< 50\%$ ) during the early stages and high relative humidity ( $> 85\%$ ) after symptom onset were related to higher death risk.
- Creating optimal indoor conditions for cases who are under quarantine/isolation may reduce their risk of death.

## 1. Introduction

The Coronavirus Disease 2019 (COVID-19) pandemic, attributable to the severe acute respiratory syndrome coronavirus 2 (SARS-CoV-2), has posed unprecedented challenges to the world including many European countries. The number of deaths in Europe (1,116,017) counts for approximately 27% of all COVID-19 deaths worldwide (data accessed on July 17, 2021 [1]). The relationship between weather conditions and COVID-19 fatality rates in Europe have not been fully determined. Furthermore, the impact of the weather conditions to which patients were exposed during the early infection stages (i.e. between virus infection and a few days after symptom onset) is unknown.

Temperature and humidity can likely influence the outcome of infection in two ways: affecting the initial viral load and modulating the immune response in patients. A possible distinction between these two mechanisms is the time point at which environmental risk factors take effect during the course of infection. The stability and the viability of SARS-CoV-2 are likely to be affected by environmental conditions when individuals are exposed to the virus [2]. A higher initial viral load may pose a higher risk for developing severe diseases later. On the other hand, the local innate immune responses that occur in the upper or lower respiratory tract could be activated immediately after symptom onset [3]. The dynamics of the innate response can be influenced by temperature or humidity [4, 5], presumably, during the time when it was activated.

According to the states of immune responses and pathogenesis, the infection course of SARS-CoV-2 could be divided into three stages: asymptomatic incubation period, non-severe symptomatic period, and severe respiratory symptomatic stage [6]. If certain controllable environmental conditions (e.g. temperature and humidity) during the non-severe symptomatic period can affect patients' innate immune responses [7, 8, 4] and hence their risk of death, preventive measures can be designed to reduce COVID-19 severity for these cases. However, until now, no such preventive measures are proposed due to that the impact of those conditions during the symptomatic period is unknown.

Although many studies have reported that low temperatures may increase the COVID-19 deaths or mortality [9, 10, 11, 12, 13, 14], these studies did not have a direct measurement on the risk of death. Case fatality rate (CFR) [15, 16] is an important index to measure the disease severity, but one limitation is that this rate only represents the average proportion of deaths among all confirmed cases over a duration of time, without the ability to reflect the instantaneous probability of death. This time-varying instantaneous probability, also called instantaneous CFR (iCFR) [17], can be

32 influenced by many factors, such as change in health care capacity [18] and variations in weather  
33 conditions [19, 20], etc. Challenges exist in estimating the iCFR due to the time delays between  
34 confirming a positive case and reporting his/her outcome [15, 21]. A more accurate estimation of  
35 the iCFR can be obtained if these delays are incorporated in modelling.

36 The study aimed at assessing the impact of weather conditions COVID-19 patients were exposed  
37 to at different timing of the early infection course on the death risk. To resolve the above issues  
38 in delays and to estimate the iCFR, stochastic modelling [22] was used, taking into account of  
39 the delays in reporting the number of newly confirmed cases and deaths in each of the European  
40 countries. After adjusting delays in reporting cases and deaths, the correlation between the iCFR  
41 and daily weather conditions at different timing since the infection was obtained using distributed  
42 lag non-linear models (DLNMs) coupled with generalized linear mixed models.

## 43 **2. Material and Methods**

### 44 *2.1. Data collection*

45 Our study focused on eight European countries (the United Kingdom, Italy, France, Spain,  
46 Germany, Netherlands, Sweden, and Romania) where the cumulative number of deaths was larger  
47 than 2000 during the first wave of the pandemic. The daily numbers of reported COVID-19 cases  
48 and deaths in these eight European countries from 16th February to 31st June 2020 were collected  
49 from ‘Our World in Data’ [1]. We defined the community outbreak began from the first two  
50 consecutive days whose average case number exceeded the country’s baseline (the 5% quantile of  
51 the maximal daily number of new cases) and ended at the first two consecutive days whose average  
52 case number was less than that baseline.

53 Daily mean temperatures for the eight European countries and daily relative humidity values for  
54 five countries (Italy, Spain, Germany, Netherlands, and Sweden) were collected from the European  
55 Climate Assessment and Dataset (ECAD)[23]. For countries (the United Kindom, France, and Ro-  
56 mania) lacking relative humidity data, we calculated relative humidity values using the ratio of the  
57 actual water vapor pressure divided by the saturation water vapor pressure[13] (see Supplementary  
58 Methods). In this study, the daily mean temperatures and relative humidity values for each country  
59 were calculated using the average records from all monitoring stations.

60 *2.2. Estimating COVID-19 transmission patterns by SEIR model*

61 We constructed a stochastic model that extended Susceptible - Exposed - Infectious - Recovered  
62 (SEIR) model to reproduce the COVID-19 transmission dynamic and estimate the iCFR and the  
63 effective reproduction number ( $R_e$ ) for each of countries during their outbreaks. The extended  
64 SEIR model contained three additional compartments: HR, hospital confirmed cases who later  
65 recovered; HD, hospital confirmed cases who later died of infection; and D, total deaths (Figure  
66 1). In order to calculate the iCFR of the date of case confirmation, newly confirmed cases were  
67 divided into HR and HD compartments following the probabilities of 1-iCFR and iCFR upon  
68 the date of case confirmation. Delays for case confirmation and death reporting were included.  
69 To estimate parameters in stochastic models, the Particle Markov chain Monte Carlo (PMCMC)  
70 method [22, 24], a combination of particle filtering and Markov chain Monte Carlo approaches was  
71 used (See Supplementary Methods). Posterior distributions of all parameters used in the model  
72 were obtained using the Nimble package in R [25] (version 3.6.1). The settings of prior distributions  
73 for these parameters were provided in Supplementary Methods.

74 *2.3. Estimating the effects of temperature and relative humidity on the COVID-19 iCFR based on*  
75 *a DLNM model*

76 In order to avoid the impacts from the variations in non-pharmaceutical interventions (NPIs)  
77 [26], we estimated the effects of weather conditions during the epidemic period when  $R_e$  remained  
78 relatively stable below 1.5. Presumably, the variations of NPIs were assumed to be minor during  
79 this period.

80 To explore the non-linear association between weather conditions and the iCFR with taking  
81 account of other unknown local factors for each of countries, a combination of distributed lag  
82 nonlinear models (DLNMs) [27] and generalized linear mixed models (GLMM) was adopted to  
83 estimate the differential effects of weather conditions exposed during the early infection stages on  
84 the iCFR. For detailed steps, please see Supplementary Methods.

85 *2.4. Model validation*

86 To assess convergence of parameters in the SEIR model, we constructed three independent  
87 chains of algorithm sets with 100,000 iterations and calculated the Gelman-Rubin convergence  
88 diagnostic statistics [28] across the three chains. For DLNM models, we used different combinations

89 of temperature and relative humidity as predictors. The model with the lowest Akaike information  
90 criterion (AIC) and Bayesian information criterion (BIC) was chosen as the best-fitting model. The  
91 prediction performance of the best-fitting model was presented by comparing its model-predicted  
92 iCFR with the iCFR calculated by SEIR models (Supplementary Figure 1).

### 93 **3. Results**

#### 94 *3.1. Case fatality in Europe*

95 In order to estimate the iCFR among the eight European countries, we developed a stochastic  
96 epidemic model (See Method and Figure 1A) taking account of delays between symptom onset and  
97 the confirmation of infection (i.e. confirmation delay) and delays between the confirmation and  
98 death (i.e. infection outcome delay). The model estimated the mean confirmation delays varied  
99 from 2.4 to 5.4 days, and the mean infection outcome delays varied from 7.9 to 12.4 days among  
100 these countries (Figure 1B, Supplementary Table 1). Incorporating the variations of such delays  
101 allowed a more accurate estimation of the country-specific iCFR and hence its relationship with  
102 weather conditions.

103 Our model successfully captured the dynamics of the daily new cases and deaths during the  
104 first wave (Figure 2, Supplementary Table 2). The epidemic patterns were similar (reaching a  
105 maximum of approximately or over eighty cases per one million people per day in April) among  
106 most of the countries, except Sweden, and Romania. Generally, the daily maximum number of  
107 deaths occurred in April. Four countries (including the United Kingdom, Italy, France, and Spain;  
108 see Figure 2A) had higher mortality rates (number of deaths per one million people): Spain had  
109 the highest daily estimated mortality rate of 18, followed by the United Kingdom 14, Italy 13, and  
110 France 11. The remaining countries (including Germany, Netherlands, Sweden and Romania; see  
111 Figure 2B ) demonstrated lower mortality rates during similar periods: Netherlands had the highest  
112 daily estimated mortality rate of 9, followed by Sweden 7, Germany 3 and Romania 2.

113 Generally, the estimated iCFRs in most of the countries decreased rapidly after reaching the  
114 maximum value in late March or early April and became more stable after then (Figure 3); however,  
115 variations still exist among countries. Among the four high mortality countries, iCFRs appeared  
116 to increase again slowly after reaching their minimum values (Figure 3A): the rates increased again  
117 from the minimum values 0.12 to 0.14 in the United Kingdom; 0.11 to 0.13 in Italy; 0.18 to 0.20 in

118 France; and 0.09 to 0.12 in Spain. iCFRs among low mortality countries generally demonstrated  
119 a decreasing trend or maintained at low values (Figure 3B): the rates maintained between 0.05  
120 and 0.06 in Germany; 0.07 and 0.08 in the Netherlands. In Sweden and Romania, after reaching  
121 their peaks in mid-April, the iCFR continued decreasing from 0.10 to 0.03 and from 0.07 to 0.03,  
122 respectively. In order to explore the association between weather conditions and the iCFR without  
123 the impacts of changes in NPIs, only the period when the value of  $R_e$  remained below 1.5 was used.  
124 For most countries,  $R_e$  reduced rapidly before April and fluctuated around 1 after then (Figure 3).

### 125 3.2. Weather effects on iCFRs

126 Daily mean temperatures among these European countries gradually increased during the first  
127 wave of the pandemic (Figure 4). Daily relative humidity in low mortality countries generally  
128 increased (Figure 4B), but the increase was not clearly observed in high mortality countries (Figure  
129 4A). During the study period, the median daily temperatures ranged between 10.4°C and 16.5°C  
130 among the eight countries, and the median relative humidity ranged between 61.8% and 75.4%  
131 (Supplementary Table 3). Furthermore, most countries had temperatures ranging from 4°C to  
132 20°C, and relative humidity ranged from 40% to 87%. The temperature changed the most in  
133 Sweden from -2°C to 21°C, and changed the least in Spain from 7°C to 20°C. Romania had the  
134 largest change in the relative humidity (i.e. 30% to 87%), and Spain had the smallest (i.e. 63% to  
135 86%).

136 The DLNM model with both temperature and relative humidity as predictors was selected as the  
137 best-fitting model for assessing the effects of environmental conditions (see Methods, Supplementary  
138 Table 4 and Supplementary Table 5). Figure 5B depicted the associations between temperatures and  
139 risk of death with a median temperature of 11°C as the reference. Lower temperatures, especially  
140 when temperatures were below 8°C, were more likely to increase COVID-19 iCFRs. We found that  
141 the estimated odds ratio (OR) of fatality peaked at virus exposure time when the temperature was  
142 low (OR=1.29 (95% CI: 1.23, 1.35) at -0.1°C). However, surprisingly the OR reached a second peak  
143 value one day after symptom onset with similar temperature (OR=1.12 (95% CI: 1.08, 1.16) at  
144 0.1°C, see Figure 5B). The lowest OR occurred at two days after symptom onset (OR=0.71 (95%  
145 CI: 0.63, 0.80) at 21.7°C), and the second-lowest was observed at virus exposure time (OR=0.81  
146 (95% CI: 0.71, 0.92) at 23.2°C).

147 These results suggest that both the initial viral load during the virus exposure time, and the

148 immune responses at approximately a few days after symptom onset were affected by environmental  
149 temperatures. Furthermore, results showed the impacts of temperatures on the risk of death were  
150 greater at virus exposure time and few days after symptom onset than other periods during early  
151 infection stages. For example, a decrease from 5°C to 0°C at one day after symptom onset increased  
152 the risk of deaths significantly (OR increased from 1.03 to 1.07; see Figure 5B). This increase was  
153 significantly greater than during the presymptomatic transmission period (e.g. 6-folds greater than  
154 that) at three days before symptom onset (OR only increased from 1.006 to 1.012).

155 The overall cumulative OR of temperature during the early infection stages was calculated by  
156 summing the effect of each time point between exposure to the virus and two days after symptom  
157 onset. A negative relationship between temperature and the OR of fatality was observed over the  
158 range of -2°C to 22°C (Figure 5C). With exposure to a warm temperature of 24°C, the cumulative  
159 ORs during the first two days after symptom onset was 0.79. In order to check whether the results  
160 are caused by autocorrelation in weather, we further performed Fourier analysis. We found that  
161 temperature in Italy has a more distinct pattern of 7 or 8-day periodicity. There is no similar  
162 pattern in temperature among other countries or in relative humidity (Supplementary Figure 2).

163 Figure 5D showed the associations between the humidity and risk of death, with a relative  
164 humidity of 62% as the reference. The highest OR (1.08, 95% CI: 1.07, 1.10) was observed at 79.6%  
165 relative humidity at symptom onset time. Figure 5E showed the cumulative OR increased when the  
166 humidity raised from 30% to 80%. However, the cumulative OR clearly reduced when the humidity  
167 increased from 80% to 89%. This reduction was mainly resulted from the effect of humidity after  
168 symptom onset (see Figure 5D). The cumulative ORs for the first two days after symptom onset  
169 was 0.66, with the exposure of relative humidity of 89%.

170 We checked the robustness of the estimated associations between weather conditions and the  
171 risks of death after re-fitting the model to data during different periods of time (i.e. from March to  
172 April, March to May, and March to June). In addition, to verify if the selected model is affected  
173 by the sample size, we re-fitted the model using smaller-size data sets (i.e. 5%, 10%, 15% and  
174 20% of samples were removed from the full dataset). In both cases, we found that the effects of  
175 weather conditions on the risk of death were generally consistent (see Supplementary Figure 3 and  
176 Supplementary Figure 4).

177 In summary, the variations of iCFRs within the eight European countries were associated with  
178 changes in weather conditions. Furthermore, the OR of fatality was clearly associated with the



179 temperature and humidity that patients were exposed to at two distinct infection stages: virus  
180 exposure and after symptom onset.

#### 181 4. Discussion

182 Although previous studies have demonstrated the impact of weather conditions (e.g. tempera-  
183 ture and humidity) on COVID-19 deaths [29, 30, 13], it is still unknown how such conditions affect  
184 COVID-19 fatality risk during the infection progress. This was the first study focused on the im-  
185 pact of weather exposures at the early infection course on the probability of death. We found that  
186 the temperature and humidity affected the risk of death significantly not only at virus exposure  
187 time but also after symptom onset (Figure 5), which suggests that environmental conditions may  
188 influence both the initial viral load and an individual's immune response to the virus (presumably  
189 through the innate immune system). These findings were obtained from distributed lag nonlinear  
190 models [27] with the iCFR estimated using a stochastic disease transmission model that accounted  
191 for delays in infection confirmation and infection outcome.

192 During the first epidemic wave in Europe, certain countries suffered high mortality rates. We  
193 found that warm conditions reduced the risk of deaths especially when the temperature was greater  
194 than 15°C. Among the study countries, Romania showed a temperature warmer than this threshold  
195 for a long period of time (more than half of the study period). Sweden and Netherlands also showed  
196 a warmer temperature for several days. In addition, our results showed that the risk of death was  
197 low when the relative humidity ranged below 50% (Figure 5E). Germany and Romania had humidity  
198 below 50% for a longer time, which may be a possible reason to explain why they experienced lower  
199 iCFR. A negative relationship between the relative humidity and iCFR was observed when the  
200 humidity was larger than 80%. Our results may help explain diverging patterns in previous studies,  
201 namely that humidity and case fatality are negatively correlated in humid areas [29], but positively  
202 correlated in arid regions [30].

203 How extremely high humidity (> 80% in Figure 5E) can affect the severity of COVID-19 remains  
204 largely unknown. Humidified air has been previously found to reduce the severity of respiratory  
205 infection of influenza in mice, through increasing the function of mucosal barrier [31]. Similarly,  
206 a recent study proposed that the use of face masks is linked to the reduced severity of COVID-19  
207 infections because the humidity of inspired air increases [5]. The beneficial effect of extremely high  
208 humidity (>80%) that was observed is likely due to a similar mechanism. Mucus layers constitute

209 a biochemical barrier to inhibit pathogen penetration [32]. A well-hydrated mucus layer ensures  
210 the continuous flow of mucus, responsible for removing pathogens from the airways and lungs [33].

211 Although the association between weather and COVID-19 related deaths has been previously  
212 reported [29, 30, 13], questions such as when (e.g. which infectious stage) and how these factors  
213 affect disease fatality have not been clarified. Many infected individuals, after being contact-  
214 traced or developing symptoms, are isolated at home or quarantine/isolation centers. During this  
215 period, certain environmental risk exposures can be manually controlled or avoided through an  
216 air-conditioner or other devices. We found that exposure to warmer temperatures (24°C) during  
217 the first two days after symptom onset can roughly reduce the iCFR by 19% compared to exposure  
218 to the reference temperature (11°C). Consistent with recent laboratory experiments showing that  
219 wearing face masks can increase the humidity of inspired air and reduce the severity of COVID-19  
220 [5], we found that exposure to high relative humidity (89%) during the first few days after symptom  
221 onset can reduce the CFR by 31% compared to the reference level (62% relative humidity). Based  
222 on all these results, therefore, we recommend adopting certain individual preventive measures: 1.  
223 to stay in a proper warm place after symptom onset; 2. to wear a face mask to increase the humidity  
224 of inspired air. However, further epidemiological observational studies (e.g. case-control study) in  
225 different population and environments are still needed to determine optimal indoor environmental  
226 conditions after symptoms appeared.

227 In addition to the evidence that low temperatures increased the stability and viability of the  
228 virus, inhalation of cold air at the initial virus exposure time, can make the upper airway more  
229 suitable for viral replication [34, 4], resulting in large viral load, and potentially more severe adverse  
230 outcomes. On the other hand, how the temperature that patients were exposed to after symptom  
231 onset affect immune responses is still unclear. This can be explained by some hypotheses of innate  
232 immunity. Macrophages, which produces cytokines and chemokines, have been found to increase  
233 in the lower airways after exposure to cold air [35]. IL-6 and TNF-alpha, the cytokines that play  
234 important roles in mediating SARS-CoV-2-associated cytokine storms [36, 37] have been reported to  
235 increase after cold exposure [38]. The activation of these factors usually begins within a week after  
236 symptom onset [3]. In general vagus nerve circuits can regulate cytokines release in macrophages to  
237 prevent potentially damaging inflammation [39, 40, 8]. However, exposure to cold stimulates cold  
238 receptors of the skin, which increase sympathetic tone and might antagonistically reduce this vagus  
239 activity [7, 41]. The overall net effect might reduce the neural mediated anti-inflammatory activity.

240 Over reaction of innate immunity may cause immune system dysregulation and severe adverse  
241 outcomes (i.e. acute respiratory distress syndrome, systemic inflammatory response syndrome, and  
242 cardiac failure [42]). These hypotheses of innate immunity suggest that there exists a link between  
243 temperature exposure in the early infection stages and COVID-19 disease severity.

244 Some limitations exist in this study. First, the effects of other interventions (e.g. increasing  
245 number of PCR tests performed and improvement of medical treatment) on the iCFR were not  
246 considered. There are minor variations in the weekly number of COVID-19 tests conducted in the  
247 eight European countries during the study period [43]. To avoid the effects caused by the variation  
248 of medical treatment and NPIs, we used the data during the first wave of the pandemic when the  
249 changes in interventions were minor (when  $R_e$  was stable and near one). Second, the data of indoor  
250 temperature and humidity are not available. It is reasonable to believe that the house indoor  
251 temperature and humidity are largely affected by the weather in Europe where air-conditioners  
252 or heaters are not frequently used at home during our study period. Thus, there is a monotonic  
253 relationship between house indoor condition and weather. Third, we cannot rule out the effect of  
254 certain confounding factors related to personal behaviours. (e.g. the dry air in winter can irritate  
255 people's airways, which triggers more people to be cautious and reduce outdoor activities). In  
256 addition, because in some countries, many cases were confirmed and isolated in hospitals around  
257 two days after symptom onset on average (see Figure 1B), hence their environmental exposure  
258 would mainly be determined by the hospital air conditioning system. Therefore, we only assess the  
259 impact of weather exposure no longer than that time.

## 260 **Ethics approval**

261 Ethics approval is not needed as the study uses publicly available country-level (aggregated)  
262 morbidity, mortality, and weather data.

## 263 **Funding**

264 The authors also acknowledge support from grants funded by City University of Hong Kong  
265 [7200573 and 9610416] and Health and Medical Research Fund [COVID190215].

## 266 **Data availability**

267 Daily reported COVID-19 cases and deaths in these eight European countries from 16th Febru-  
268 ary to 31st June 2020 were collected from ‘Our World in Data’ ([https://github.com/owid/covid-19-](https://github.com/owid/covid-19-data/tree/master/public/data)  
269 [data/tree/master/public/data](https://github.com/owid/covid-19-data/tree/master/public/data)). Daily weather data for the eight European countries were collected  
270 from the European Climate Assessment and Dataset (<https://www.ecad.eu/>) and United States Na-  
271 tional Oceanic and Atmospheric Administration ([https://www.ncei.noaa.gov/access/search/data-](https://www.ncei.noaa.gov/access/search/data-search/global-summary-of-the-day)  
272 [search/global-summary-of-the-day](https://www.ncei.noaa.gov/access/search/data-search/global-summary-of-the-day)). The data and materials are available from the corresponding  
273 author on reasonable request.

## 274 **Acknowledgements**

275 We thank Dr. Kwan Ting Chow at City University of Hong Kong and Dr. Liao Ben-Yang  
276 at National Health Research Institutes for their valuable comments. We thank Dr. Yun Huang  
277 at Sun Yat-sen University, Dr. Lindsey Wu at London School of Hygiene & Tropical Medicine,  
278 Dr. Rahul Subramanian at University of Chicago, M. Pear Hossain, Zhaojun Ding, and Dr. Sir  
279 Colin Blakemore at City University of Hong Kong for their suggestions and contributions in the  
280 preparation of the manuscript. We thank Dr. Antonio Gasparrini at London School of Hygiene &  
281 Tropical Medicine for his suggestions on the verification of sample size in the DLNM model.

## 282 **Author contributions**

283 HY and JL designed the study. JL collected, analyzed, and modelled the data. JL and HY  
284 wrote the paper.

285 **Disclosure statement**

286 All authors declare that they have no competing interests.

287 **References**

- 288 [1] Our world in data, [Online], [https://github.com/owid/covid-19-data/tree/master/](https://github.com/owid/covid-19-data/tree/master/public/data)  
289 [public/data](https://github.com/owid/covid-19-data/tree/master/public/data) Accessed July 19, 2021.
- 290 [2] A. W. Chin, J. T. Chu, M. R. Perera, K. P. Hui, H.-L. Yen, M. C. Chan, M. Peiris, L. L. Poon,  
291 Stability of sars-cov-2 in different environmental conditions, *The Lancet Microbe* 1 (1) (2020)  
292 e10.
- 293 [3] J. L. Schultze, A. C. Aschenbrenner, Covid-19 and the human innate immune system, *Cell*  
294 (2021).
- 295 [4] P. V'kovski, M. Gultom, J. N. Kelly, S. Steiner, J. Russeil, B. Mangeat, E. Cora, J. Pe-  
296 zoldt, M. Holwerda, A. Kratzel, L. Laloli, M. Wider, J. Portmann, T. Tran, N. Ebert,  
297 H. Stalder, R. Hartmann, V. Gardeux, D. Alpern, B. Deplancke, V. Thiel, R. Dijkman, Dis-  
298 parate temperature-dependent virus–host dynamics for sars-cov-2 and sars-cov in the human  
299 respiratory epithelium, *PLoS biology* 19 (3) (2021) e3001158.
- 300 [5] J. M. Courtney, A. Bax, Hydrating the respiratory tract: An alternative explanation why  
301 masks lower severity of covid-19, *Biophysical Journal* 120 (6) (2021) 994–1000.
- 302 [6] Y. Shi, Y. Wang, C. Shao, J. Huang, J. Gan, X. Huang, E. Bucci, M. Piacentini, G. Ippolito,  
303 G. Melino, Covid-19 infection: the perspectives on immune responses (2020).
- 304 [7] N. Rintamaki, Human responses to cold, *Alaska medicine* 49 (2) (2007) 29.
- 305 [8] U. Andersson, K. J. Tracey, Reflex principles of immunological homeostasis, *Annual review of*  
306 *immunology* 30 (2012) 313–335.
- 307 [9] S. A. Sarkodie, P. A. Owusu, Impact of meteorological factors on covid-19 pandemic: Evidence  
308 from top 20 countries with confirmed cases, *Environmental Research* 191 (2020) 110101.

- 309 [10] Y. Ma, Y. Zhao, J. Liu, X. He, B. Wang, S. Fu, J. Yan, J. Niu, J. Zhou, B. Luo, Effects of  
310 temperature variation and humidity on the death of covid-19 in wuhan, china, *Science of The*  
311 *Total Environment* (2020) 138226.
- 312 [11] F. Benedetti, M. Pachetti, B. Marini, R. Ippodrino, R. C. Gallo, M. Ciccozzi, D. Zella, Inverse  
313 correlation between average monthly high temperatures and covid-19-related death rates in  
314 different geographical areas, *Journal of translational medicine* 18 (1) (2020) 1–7.
- 315 [12] Y. Jiang, J. Xu, The association between covid-19 deaths and short-term ambient air pollu-  
316 tion/meteorological condition exposure: a retrospective study from wuhan, china, *Air Quality,*  
317 *Atmosphere Health* (2020) 1–5.
- 318 [13] Y. Wu, W. Jing, J. Liu, Q. Ma, J. Yuan, Y. Wang, M. Du, M. Liu, Effects of temperature and  
319 humidity on the daily new cases and new deaths of covid-19 in 166 countries, *Science of the*  
320 *Total Environment* (2020) 139051.
- 321 [14] J. Yuan, M. Li, G. Lv, Z. K. Lu, Monitoring transmissibility and mortality of covid-19 in  
322 europe, *International Journal of Infectious Diseases* (2020).
- 323 [15] M. A. Khafaie, F. Rahim, Cross-country comparison of case fatality rates of covid-19/sars-cov-  
324 2, *Osong Public Health and Research Perspectives* 11 (2) (2020) 74.
- 325 [16] G. Fan, Z. Yang, Q. Lin, S. Zhao, L. Yang, D. He, Decreased case fatality rate of covid-19  
326 in the second wave: a study in 53 countries or regions, *Transboundary and emerging diseases*  
327 (2020).
- 328 [17] A. Ramos, M. Ferrández, M. Vela-Pérez, A. Kubik, B. Ivorra, A simple but complex enough  
329  $\theta$ -sir type model to be used with covid-19 real data. application to the case of italy, *Physica*  
330 *D: Nonlinear Phenomena* 421 (2021) 132839.
- 331 [18] J. R. Khan, N. Awan, M. Islam, O. Muurlink, Healthcare capacity, health expenditure, and  
332 civil society as predictors of covid-19 case fatalities: A global analysis, *Frontiers in public*  
333 *health* 8 (2020) 347.
- 334 [19] A. Poddar, A. Gogate, A. S. Kumbar, K. C. S. Francis, J. Appajigol, S. B. Javali, Factors  
335 associated with case fatality in covid-19, *Journal of the Scientific Society* 47 (2) (2020) 79.

- 336 [20] G. Orrù, R. Ferdinando, A. Scano, A. Restivo, S. Del Giacco, S. Deidda, D. Firinu, M. Cam-  
337 pagna, G. Cossu, L. Chessa, G. Kalcev, M. G. Carta, The climate in the european union and  
338 the enlarged european region is a determinant of the covid-19 case fatality ratio (2020).
- 339 [21] A. Newall, R. Leong, A. Nazareno, D. Muscatello, J. Wood, W. Kim, Delay-adjusted age-and  
340 sex-specific case fatality rates for covid-19 in south korea: Evolution in the estimated risk  
341 of mortality throughout the epidemic, *International Journal of Infectious Diseases* 101 (2020)  
342 306–311.
- 343 [22] A. Endo, E. van Leeuwen, M. Baguelin, Introduction to particle markov-chain monte carlo for  
344 disease dynamics modellers, *Epidemics* 29 (2019) 100363.
- 345 [23] European climate assessment and dataset, [Online], [https://www.ecad.eu/dailydata/  
346 predefinedseries.php](https://www.ecad.eu/dailydata/predefinedseries.php) Accessed July 15, 2021.
- 347 [24] R. Li, S. Pei, B. Chen, Y. Song, T. Zhang, W. Yang, J. Shaman, Substantial undocumented  
348 infection facilitates the rapid dissemination of novel coronavirus (sars-cov-2), *Science* 368 (6490)  
349 (2020) 489–493.
- 350 [25] P. de Valpine, D. Turek, C. J. Paciorek, C. Anderson-Bergman, D. T. Lang, R. Bodik, Pro-  
351 gramming with models: writing statistical algorithms for general model structures with nimble,  
352 *Journal of Computational and Graphical Statistics* 26 (2) (2017) 403–413.
- 353 [26] S. Flaxman, S. Mishra, A. Gandy, H. J. T. Unwin, T. A. Mellan, H. Coupland, C. Whit-  
354 taker, H. Zhu, T. Berah, J. W. Eaton, et al., Estimating the effects of non-pharmaceutical  
355 interventions on covid-19 in europe, *Nature* 584 (7820) (2020) 257–261.
- 356 [27] A. Gasparrini, Distributed lag linear and non-linear models in r: the package dlnm, *Journal of*  
357 *statistical software* 43 (8) (2011) 1.
- 358 [28] A. Gelman, D. B. Rubin, Inference from iterative simulation using multiple sequences, *Statis-  
359 tical science* 7 (4) (1992) 457–472.
- 360 [29] I. V. Biktasheva, Role of a habitat’s air humidity in covid-19 mortality, *Science of the Total*  
361 *Environment* 736 (2020) 138763.

- 362 [30] K. Li, The link between humidity and covid-19 caused death, *Journal of Biosciences and*  
363 *Medicines* 8 (6) (2020) 50–55.
- 364 [31] E. Kudo, E. Song, L. J. Yockey, T. Rakib, P. W. Wong, R. J. Homer, A. Iwasaki, Low ambient  
365 humidity impairs barrier function and innate resistance against influenza infection, *Proceedings*  
366 *of the National Academy of Sciences* 116 (22) (2019) 10905–10910.
- 367 [32] J. McAuley, L. Corcilius, H. Tan, R. Payne, M. McGuckin, L. Brown, The cell surface mucin  
368 muc1 limits the severity of influenza a virus infection, *Mucosal immunology* 10 (6) (2017)  
369 1581–1593.
- 370 [33] M. Moriyama, W. J. Hugentobler, A. Iwasaki, Seasonality of respiratory viral infections, *Annual*  
371 *review of virology* 7 (2020) 83–101.
- 372 [34] D. Kang, C. Ellgen, The role of temperature in covid-19 disease severity and transmission  
373 rates, *Preprints* (2020).
- 374 [35] K. Larsson, G. Tornling, D. Gavhed, C. Muller-Suur, L. Palmberg, Inhalation of cold air in-  
375 creases the number of inflammatory cells in the lungs in healthy subjects, *European respiratory*  
376 *journal* 12 (4) (1998) 825–830.
- 377 [36] S. Hojyo, M. Uchida, K. Tanaka, R. Hasebe, Y. Tanaka, M. Murakami, T. Hirano, How covid-  
378 19 induces cytokine storm with high mortality, *Inflammation and Regeneration* 40 (1) (2020)  
379 1–7.
- 380 [37] A. Copaescu, O. Smibert, A. Gibson, E. J. Phillips, J. A. Trubiano, The role of il-6 and other  
381 mediators in the cytokine storm associated with sars-cov-2 infection, *Journal of Allergy and*  
382 *Clinical Immunology* 146 (3) (2020) 518–534.
- 383 [38] S. G. Rhind, J. W. Castellani, I. K. Brenner, R. J. Shephard, J. Zamecnik, S. J. Montain, A. J.  
384 Young, P. N. Shek, Intracellular monocyte and serum cytokine expression is modulated by  
385 exhausting exercise and cold exposure, *American Journal of Physiology-Regulatory, Integrative*  
386 *and Comparative Physiology* 281 (1) (2001) R66–R75.
- 387 [39] M. Rosas-Ballina, P. S. Olofsson, M. Ochani, S. I. Valdés-Ferrer, Y. A. Levine, C. Reardon,  
388 M. W. Tusche, V. A. Pavlov, U. Andersson, S. Chavan, T. W. Mak, K. J. Tracey, Acetylcholine-



- 389 synthesizing t cells relay neural signals in a vagus nerve circuit, *Science* 334 (6052) (2011)  
390 98–101.
- 391 [40] H. Wang, M. Yu, M. Ochani, C. A. Amella, M. Tanovic, S. Susarla, J. H. Li, H. Wang, H. Yang,  
392 L. Ulloa, Y. Al-Abed, C. J. Czura, K. J. Tracey, Nicotinic acetylcholine receptor  $\alpha 7$  subunit is  
393 an essential regulator of inflammation, *Nature* 421 (6921) (2003) 384–388.
- 394 [41] C. Molnar, J. Gair, *Concepts of biology: 1st canadian edition* (2015).
- 395 [42] J. Zhang, H. Wu, X. Yao, D. Zhang, Y. Zhou, B. Fu, W. Wang, H. Li, Z. Wang, Z. Hu, Y. Ren,  
396 R. Sun, Z. Tian, X. Bian, H. Wei, Pyroptotic macrophages stimulate the sars-cov-2-associated  
397 cytokine storm, *Cellular & molecular immunology* (2021) 1–3.
- 398 [43] ECDC, Data on testing for covid-19 by week and country, [Online], <https://www.ecdc.europa.eu/en/publications-data/covid-19-testing/> Accessed July 15, 2021.  
399
- 400 [44] J. Liang, H.-Y. Yuan, L. Wu, D. U. Pfeiffer, Estimating effects of intervention measures on  
401 covid-19 outbreak in wuhan taking account of improving diagnostic capabilities using a mod-  
402 elling approach, *BMC infectious diseases* 21 (1) (2021) 1–10.

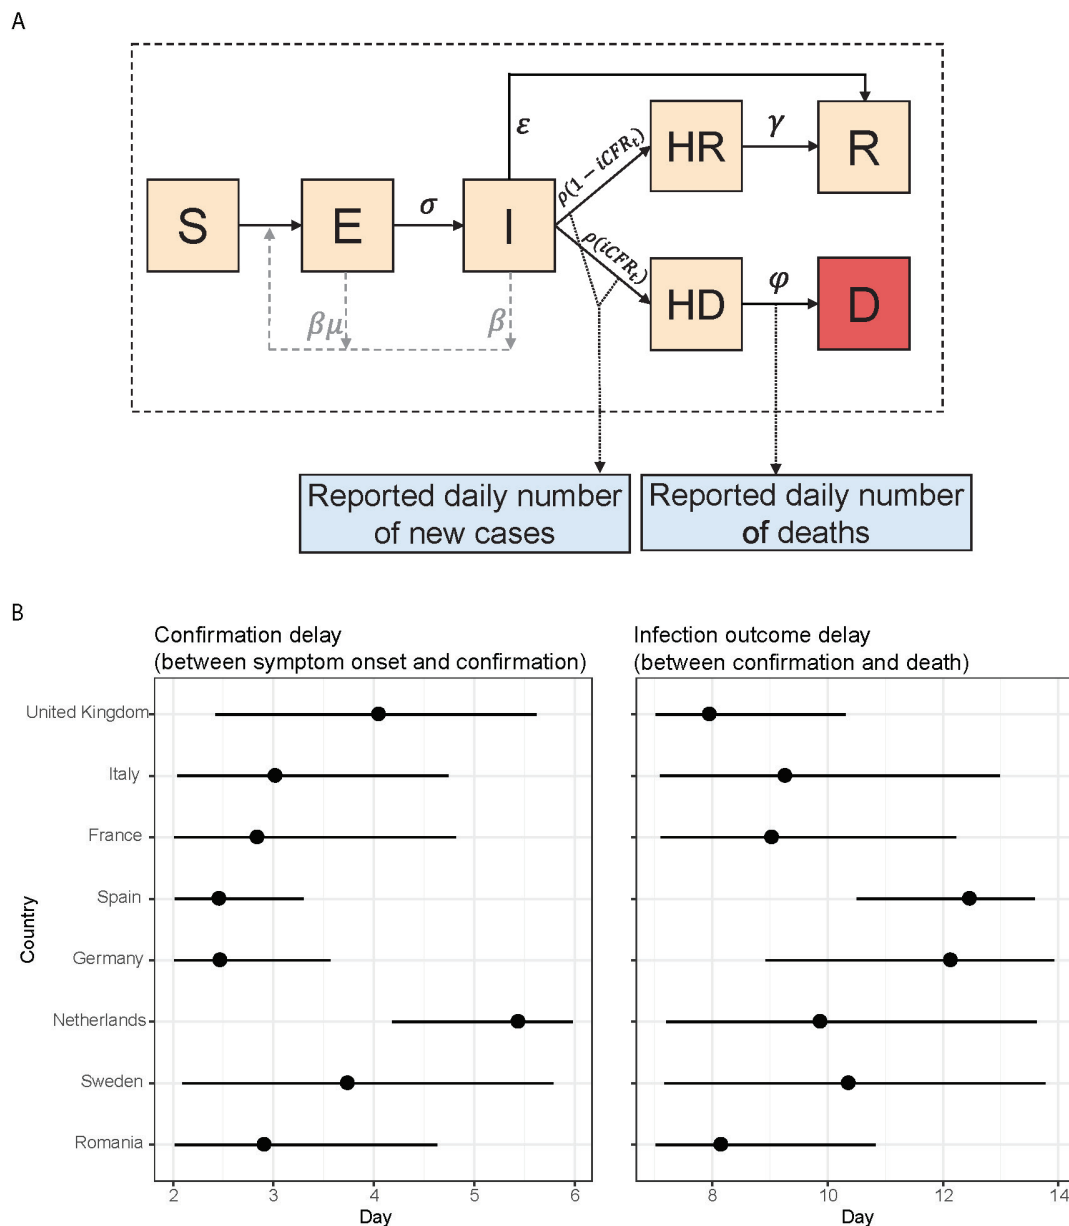

Figure 1: (A) Schematic of the extended Susceptible, Exposed, Infectious and Recovered model with case confirmation and death statuses. The total population was divided into seven compartments: S (susceptible), E (exposed), I (infectious after the incubation period), HR (hospital confirmed cases who later recovered), HD (hospital confirmed cases who later died), R (recovered), and D (death).  $\beta$  is the transmission rate,  $\frac{1}{\sigma}$  is the incubation period,  $\mu$  is the proportion of pre-symptomatic infectious individuals among the total number of exposed individuals [44],  $\epsilon$  is the recovery rate for un-reported cases (mainly asymptomatic cases),  $\frac{1}{\rho}$  is the confirmation delay,  $\frac{1}{\varphi}$  is the infection outcome delay, and  $\gamma$  is the recovery rate for hospital confirmed cases.  $iCFR_t$  is the iCFR at time  $t$ . (B) Estimated confirmation delay and infection outcome delay in the eight European countries. Black dots represent the posterior mean value and horizontal lines represent the 95% posterior credible intervals.

### A Countries with relatively high mortality rate

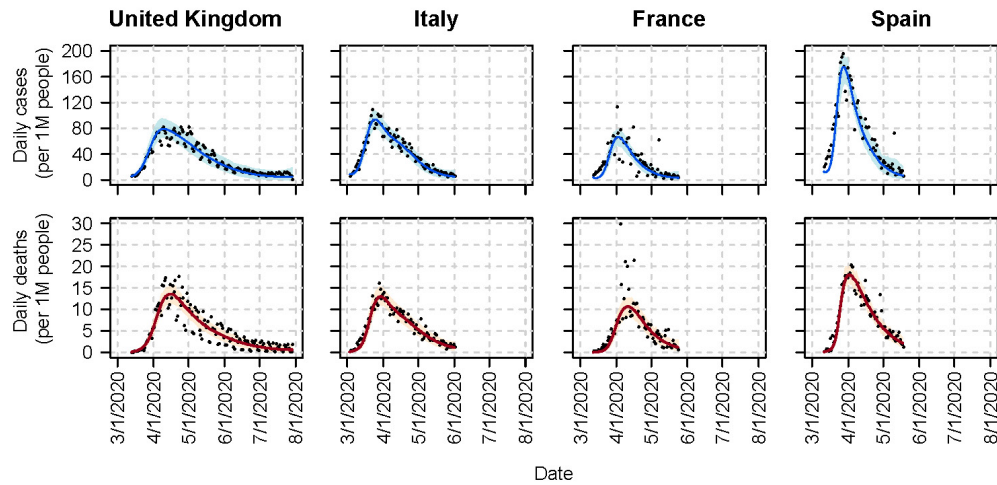

### B Countries with relatively low mortality rate

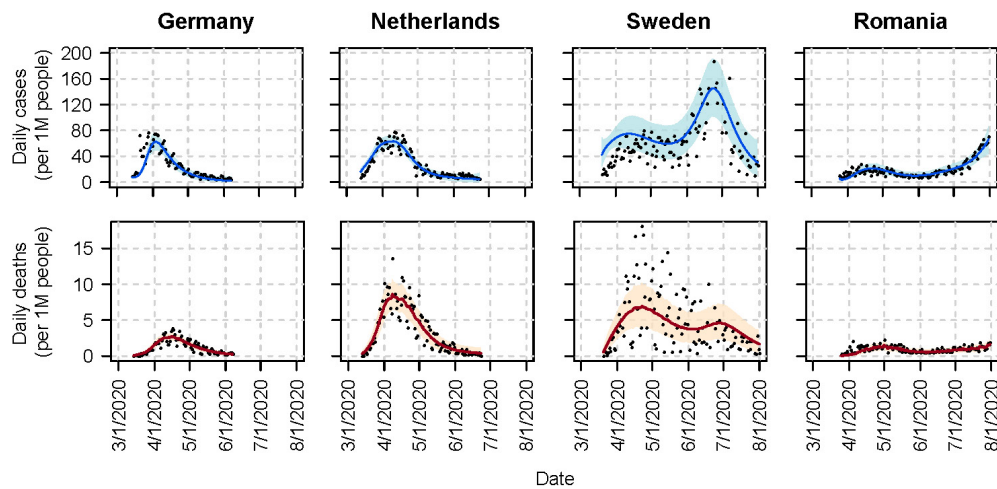

Figure 2: Observed and model-estimated daily numbers of cases and deaths per one million people in the eight European countries during the outbreaks. (A) Daily number of cases and deaths in countries where the mortality rates were relatively high. (B) Daily number of cases and deaths in countries where the mortality rates were relatively low. Black dots represent observations, blue and orange curves represent the mean estimation results of daily cases and deaths; light orange and light blue shaded areas represent their 95% credible intervals. Daily mean estimation of cases, deaths and their credible intervals were obtained from the PMCMC posterior samples.

### A Countries with relatively high mortality rate

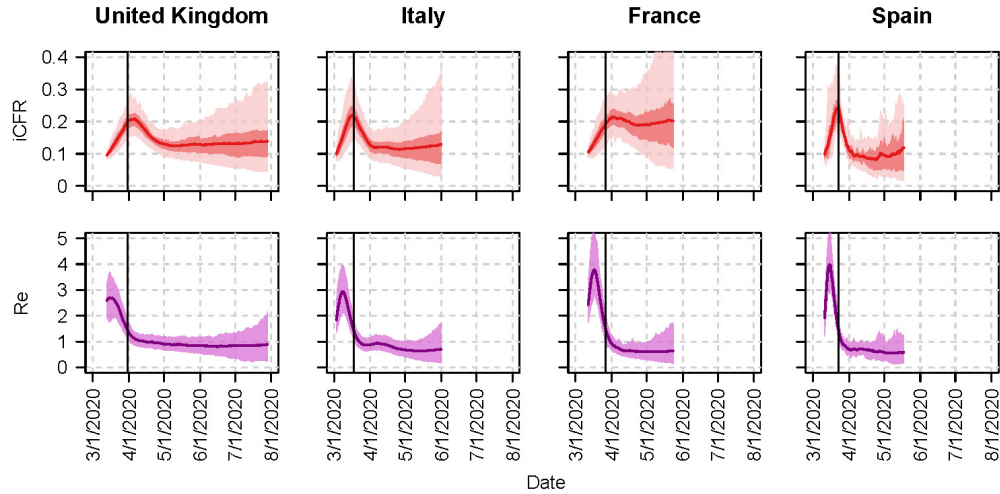

### B Countries with relatively low mortality rate

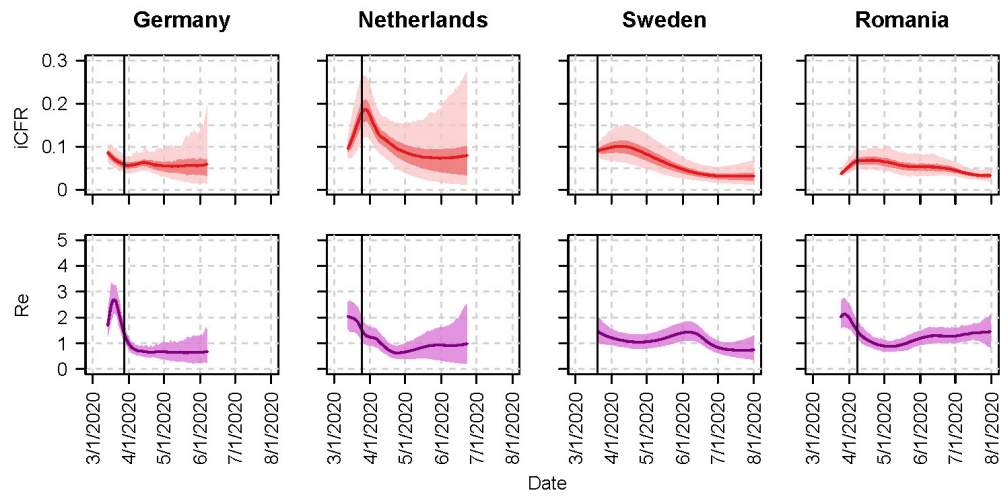

Figure 3: Model-estimated iCFR and Re in the eight European countries. (A) Daily iCFR and Re in countries where the mortality rates were relatively high. (B) Daily iCFR and Re in countries where the mortality rates were relatively low. Red and purple curves represent the estimated mean iCFR and Re, light red and dark red shaded areas represent the 95% and 50% credible intervals for iCFR. Purple shaded areas represent the 95% credible intervals for Re. The black vertical lines refer to the dates when Re reduced to below 1.5. iCFRs after these dates were used for estimating the effects of weather conditions. Daily mean iCFR, Re, and their credible intervals were obtained from the PMCMC posterior samples.

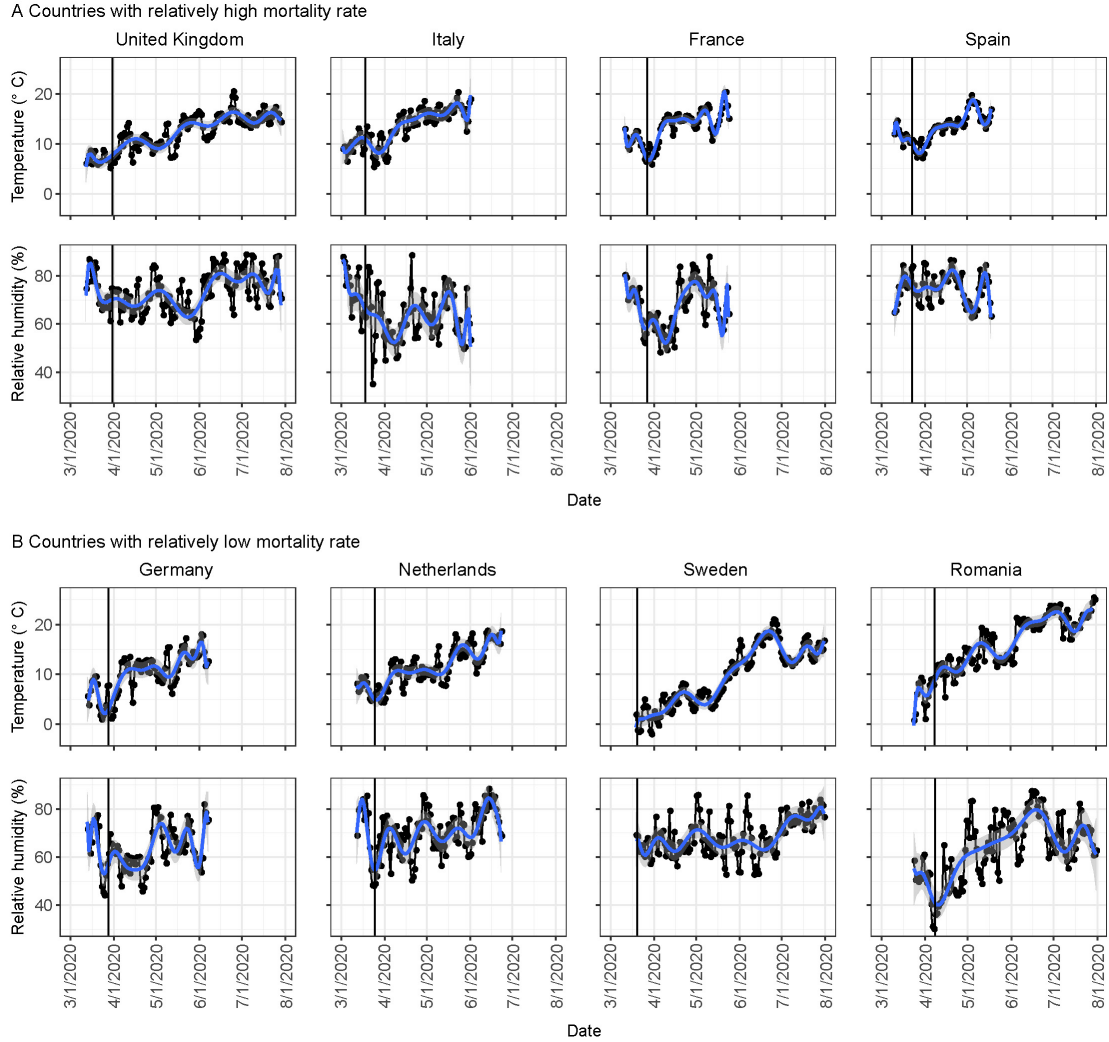

Figure 4: Daily mean temperature and relative humidity for the eight European countries. (A) Daily mean temperature and humidity in countries where the mortality rates were relatively high. (B) Daily mean temperature and humidity in countries where the mortality rates were relatively low. The blue curve represents the trend of daily temperature and humidity, which was obtained from a smoothing curve (a 18th order polynomial function). The grey shadows represent 95% credible intervals for the trends. The black vertical lines refer to the dates when  $R_e$  was reduced to below 1.5.

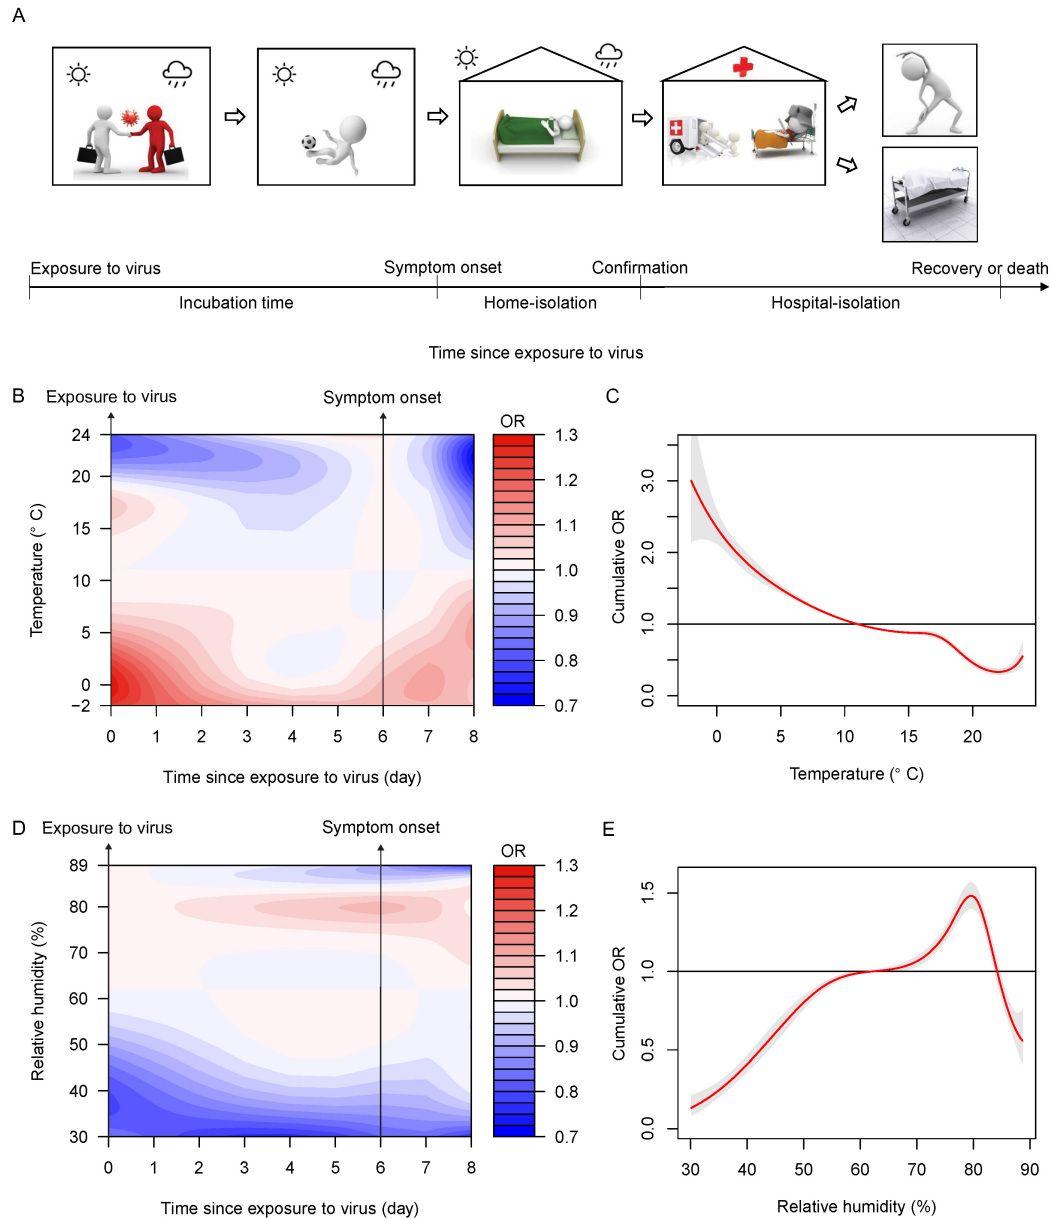

Figure 5: The effect of weather conditions on the COVID-19 fatality rate. (A) The timeline of COVID-19 infection course while taking account of the effects of weather conditions (i.e. temperature and relative humidity). The duration of home-isolation was approximately equal to the confirmation delay because many cases were isolated at hospitals after being confirmed. The duration of hospital-isolation for cases who later died was indicated by the infection outcome delay. Weather conditions mainly affected infected individuals during the early infection period including exposure to virus, incubation time and home-isolation period. During hospital-isolation period, indoor temperature and humidity were controlled by hospitals. (B and D) Relationships between weather conditions and the OR of fatality at different time point between exposure to virus and two days after symptom onset. Redder colours indicate higher OR. 11°C of the temperature and 62% of the relative humidity were used as references. (C and E) The estimated cumulative effects of the temperature and the relative humidity on the fatality. The red lines are the mean ORs, and the grey shaded areas are the 95% credible intervals.

Supplementary Materials:  
Assessing the impact of temperature and humidity exposures during  
early infection stages on case-fatality of COVID-19: a modelling study  
in Europe

Jingbo Liang<sup>a</sup>, Hsiang-Yu Yuan<sup>a,b,\*</sup>

<sup>a</sup>*Department of Biomedical Sciences, Jockey Club College of Veterinary Medicine and Life Sciences, City University of Hong Kong, Hong Kong*

<sup>b</sup>*Centre for Applied One Health Research and Policy Advice, City University of Hong Kong, Hong Kong*

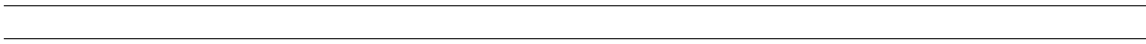

---

\*Corresponding author  
Email address: [sean.yuan@cityu.edu.hk](mailto:sean.yuan@cityu.edu.hk) (Hsiang-Yu Yuan)

## 1. Supplementary Methods

### 1.1. Data

For countries (the United Kingdom, France and Romania) lacking relative humidity data, we calculated relative humidity values using the ratio of the actual water vapor pressure ( $P_w$ ) divided by the saturation water vapor pressure ( $P_{ws}$ ) using the following formula [1]:

$$\begin{aligned}RH &= \frac{P_w}{P_{ws}} \\ P_w &= P_0 e^{\frac{AT_d}{B+T_d}} \\ P_{ws} &= P_0 e^{\frac{AT_a}{B+T_a}}\end{aligned}\tag{1}$$

Where  $RH$  denoted the relative humidity.  $P_0$  denoted the saturation vapor pressure as 6.11 MB with a reference temperature of 273.15°K. A (17.43) and B (240.73) are constant values [1].  $T_d$  is the dew point collected from the United States National Oceanic and Atmospheric Administration [2], and  $T_a$  is the observed temperature. In this study, the daily mean temperatures and relative humidity values for each country were calculated as the average records from all monitoring stations.

### 1.2. SEIR stochastic model

There were several assumptions for the SEIR model: (1) susceptible individuals became exposed after contacting with the virus; (2) exposed individuals could be divided into two groups, non-infectious exposed individuals and infectious pre-symptomatic individuals [3]; and (3) all hospital confirmed cases were isolated and could not transmit the disease. Based on these assumptions, our SEIR model was derived as follows:

$$\begin{aligned}S_t &= S_{t-1} - \Delta_{E,t} \\ E_t &= E_{t-1} + \Delta_{E,t} - \Delta_{I,t} \\ I_t &= I_{t-1} + \Delta_{I,t} - \Delta_{HR,t} - \Delta_{HD,t} - \Delta_{IR,t} \\ HR_t &= HR_{t-1} + \Delta_{HR,t} - \Delta_{HRR,t} \\ HD_t &= HD_{t-1} + \Delta_{HD,t} - \Delta_{D,t} \\ R_t &= R_{t-1} + \Delta_{IR,t} + \Delta_{HRR,t} \\ D_t &= D_{t-1} + \Delta_{D,t}\end{aligned}\tag{2}$$



17 Where  $\Delta_{E,t}$  represented the number of newly exposed individuals during the time interval t-1 to  
 18 t,  $\Delta_{I,t}$  was the number of newly symptom-onset infections,  $\Delta_{HR,t}$  was the number of newly hospital-  
 19 confirmed cases who later recovered,  $\Delta_{HD,t}$  was the number of newly hospital-confirmed cases who  
 20 later died,  $\Delta_{IR,t}$  was the number of newly recovered cases who were not reported (confirmed)  
 21 by hospitals,  $\Delta_{HRR,t}$  was the number of newly recovered cases that were reported (confirmed)  
 22 by hospitals, and  $\Delta_{D,t}$  was the number of newly reported deaths. We assumed that  $\Delta_{E,t}$ ,  $\Delta_{I,t}$ ,  
 23  $\Delta_{HR,t} + \Delta_{HD,t}$ ,  $\Delta_{IR,t}$ ,  $\Delta_{HRR,t}$ , and  $\Delta_{D,t}$  followed Poisson distributions, and  $\Delta_{HD,t}$  followed a  
 24 binomial distribution with the rate parameter as the  $iCFR_t$ :

$$\begin{aligned}
 \Delta_{E,t} &\sim \text{Poisson}\left(\frac{\beta_{t-1}[\mu E_{t-1} + I_{t-1}]S_{t-1}}{N}\right) \\
 \Delta_{I,t} &\sim \text{Poisson}(\sigma E_{t-1}) \\
 \Delta_{HR,t} + \Delta_{HD,t} &\sim \text{Poisson}(\rho I_{t-1}) \\
 \Delta_{HD,t} &\sim \text{Binom}(iCFR_t, \Delta_{HR,t} + \Delta_{HD,t}) \\
 \Delta_{IR,t} &\sim \text{Poisson}(\varepsilon I_{t-1}) \\
 \Delta_{HRR,t} &\sim \text{Poisson}(\gamma HR_{t-1}) \\
 \Delta_{D,t} &\sim \text{Poisson}(\varphi HD_{t-1}) \\
 \beta_t &= \beta_{t-1}e^{X_1}, X_1 \sim \text{Normal}(0, \tau_1^2) \\
 iCFR_t &= iCFR_{t-1}e^{X_2}, X_2 \sim \text{Normal}(0, \tau_2^2)
 \end{aligned} \tag{3}$$

25 where  $\beta_t$  is the transmission rate;  $\mu$  is the proportion of infectious pre-symptomatic individuals  
 26 among all exposed individuals, calculated as  $\mu = \left(\frac{\frac{1}{\sigma} - \frac{1}{\eta}}{\frac{1}{\sigma}}\right)$  [3], in which  $\eta$  was the rate at which  
 27 exposed individuals become infectious pre-symptomatic infections ( $1/\eta$  was the latent period), and  $\sigma$   
 28 was the rate at which exposed individuals become symptom-onset infections ( $1/\sigma$  was the incubation  
 29 period);  $\rho$  was the case confirmation rate ( $1/\rho$  was the time between symptom onset and case  
 30 confirmation),  $iCFR_t$  was the iCFR at time t,  $\gamma$  was the recovery rate of hospital-confirmed cases  
 31 ( $1/\gamma$  was the time between case confirmation and recovery),  $\varepsilon$  was the recovery rate of cases who  
 32 were not reported (confirmed) by hospitals, and  $\varphi$  was the death rate ( $1/\varphi$  was the time between  
 33 case confirmation and death). During model fitting, we assumed that  $\beta_t$  and  $iCFR_t$  followed  
 34 Brownian motion by time [4] with the standard deviation parameters as  $\tau_1$  and  $\tau_2$ .  $\tau_1$  was set as  
 35 0.25 for Sweden's, Romania's and the United Kingdom's model; as 0.3 for Germany's and France's

36 model; as 0.35 for Netherlands' and Italy's model; as 0.4 for Spain's model.  $\tau_2$  was set as 0.25 for  
 37 Sweden's and Romania's model; as 0.3 for the United Kingdom's and Germany's model; as 0.35 for  
 38 Italy's, France's and Netherlands' model; as 0.4 for Spain's model. The values of  $\tau_1$  and  $\tau_2$  were  
 39 chosen by the smallest Watanabe–Akaike Information Criterion (WAIC) [5, 6].

40 To map our model outputs to actual observed data, we constructed an observation model (equa-  
 41 tion (4)), assuming the variations between the actual data and our model predictions follow Gaus-  
 42 sian distributions. As equation (4) showed, the likelihood of observing daily reported new cases  
 43 ( $Cases_{rep,t}$ ) was calculated through a Gaussian distribution with the mean defined as the num-  
 44 ber of model predicted new-confirmed cases ( $\Delta_{HR,t} + \Delta_{HD,t}$ ) where  $\tau_c$  (20% of the maximum of  
 45  $Cases_{rep,t}$ ) was the standard deviation. Similarly, the likelihood of observing daily new deaths  
 46 ( $Deaths_{rep,t}$ ) was also calculated through a Gaussain distribution with the mean defined as the  
 47 number of model predicted new deaths ( $\Delta_{D,t}$ ), where  $\tau_d$  (20% of the maximum of  $Deaths_{rep,t}$ ) was  
 48 the standard deviation.

$$\begin{aligned} Cases_{rep,t} &\sim Normal(\Delta_{HR,t} + \Delta_{HD,t}, \tau_c^2) \\ Deaths_{rep,t} &\sim Normal(\Delta_{D,t}, \tau_d^2) \end{aligned} \quad (4)$$

49 Based on the next-generation matrix (NGM) method [7], time-varied country-specific  $Re$  was  
 50 calculated as the first eigenvector of the matrix  $NGM_t$  [8]:

$$NGM_t = \left( (-1) \begin{bmatrix} \beta_t \left( \frac{\frac{1}{\sigma} - \frac{1}{\eta}}{\frac{1}{\sigma}} \right) S_t & \frac{\beta_t S_t}{N} \\ 0 & 0 \end{bmatrix} \begin{bmatrix} -\sigma & 0 \\ \sigma & -\rho \end{bmatrix}^{-1} \right) \quad (5)$$

51 Prior distributions for the parameters were set as follows: for the latent period,  $1/\eta \sim U[2, 3]$   
 52 [9]; for the incubation period,  $1/\sigma \sim N[5.5, 0.25]$  [10]; for the time between symptom onset and  
 53 case confirmation,  $1/\rho \sim U[2, 6]$  [11, 12]; for the recovery time of hospital-confirmed cases,  $1/\gamma \sim$   
 54  $N[14, 0.01]$  [13]; for the recovery time of hidden cases who were not reported (confirmed) by hospitals,  
 55  $1/\varepsilon \sim U[16, 0.01]$  [13]; for the time between case confirmation and death,  $1/\varphi \sim U[7, 14]$  [14, 12].

### 56 1.3. DLNM model

57 To explore the effects of weather conditions during the early infection period, we defined the  
 58 minimum lag times ( $lag = 0$ ) as the second day after symptom onset, given some infected cases  
 59 would be isolated in the hospitals two days after symptom onset (Supplementary Table 2) and

60 the outdoor environment would not influence their infection process during that time; we set the  
61 maximum lag time as nine days (the length between exposure to the virus and two days after  
62 symptom onset, Supplementary Table 2). In this study, we used the odds ratio (OR) of fatality to  
63 explore the association of death and different levels of temperature/humidity. The OR of fatality  
64 was calculated as the ratio of the odds of fatality when subjects were exposed to a particular level  
65 of temperature/humidity to the odds of fatality when subjects were exposed to the reference tem-  
66 perature/humidity. Here, we choose a median reference temperature of 11°C and relative humidity  
67 of 62%.

The model was formulated as:

$$\log \left( \frac{\overline{iCFR}_t^i}{1 - \overline{iCFR}_t^i} \right) = \alpha + \alpha^i + \sum_{lag=0}^8 cb(Temp_t^i, lag) + \sum_{lag=0}^8 cb(RH_t^i, lag) \quad (6)$$

68 where  $\overline{iCFR}_t^i$  was the expected iCFR in country  $i$  at time  $t$ ;  $\alpha$  was the intercept;  $\alpha^i$  represented  
69 country-specific random effects (e.g. local conditions in health care);  $Temp_t^i$  was the daily mean  
70 temperature;  $RH_t^i$  was the daily mean relative humidity value;  $lag$  was the lag time between  
71 exposure to the virus and two days after symptom onset;  $cb(Temp_t^i, lag)$  and  $cb(RH_t^i, lag)$  were  
72 cross basis functions [15], modeling weather exposure-response and lag-response relationships, with  
73 quadratic B-spline function knots placed at equal intervals in the weather range to permit sufficient  
74 flexibility in the tails. The Akaike information criterion (AIC) was used to test the model robustness  
75 using different degrees of freedom (knots). We found five degrees of freedom for temperature and  
76 relative humidity had the best performance in model fitting.

## 77 2. Country-specific effect on fatality rate

78 We used a generalized linear mixed model (i.e. supplementary Equation (6)) to incorporate  
79 the country-level variations as random effects (i.e. varying-intercept random model). To explore  
80 these random effects on fatality rates for different periods of time, we re-fitted the model using data  
81 during March to April, March to May, and March to June separately.

82 As shown in Supplementary Table 6, France had the largest intercept (i.e. country-specific effect  
83 on case fatality rate) when the full data set (i.e. March to July) was used. Italy had the second  
84 largest. Sweden had the lowest intercepts. According to the model formula in the supplementary

85 Equation (6), while holding all other predictors (i.e. temperature and relative humidity) constant,  
86 the larger intercept indicates a higher risk of death.

87 After re-fitting data during different periods of time (i.e. from March to April, March to May, and  
88 March to June), we found that the effects of the country-level variations on fatality were similar.  
89 France consistently had the largest intercept (estimated mean intercept was -2.70 for March to  
90 April, -2.49 for March to May, -2.22 for March to June); Italy had the second-largest except for  
91 March to April (estimated mean intercept was -2.88 for March to May, -2.62 for March to June); and  
92 Germany and Sweden had smaller intercepts. Moreover, we checked the robustness of the estimated  
93 associations between weather conditions and the risks of death for these re-fitted models. As shown  
94 in Supplementary Figure 3, the relationships between temperature (and humidity) and risk of death  
95 risk were consistent when datasets between different time periods were used (i.e. March to April,  
96 March to May, March to June).

### 97 **3. Verification of sample size in DLNM model**

98 The sample size of each country of the full data set was shown in Supplementary Table 7. In  
99 order to verify the impact of sample size on the selected model (see equation (6) in supplementary  
100 methods), we validated the model by using different sample size: we randomly removed 5%, 10%,  
101 15%, and 20% of the samples in each country from the full data set and re-fitted the model to the  
102 removed data set. We found that the effects of weather conditions on the risk of death were generally  
103 consistent even 20% of samples have been removed (Supplementary Figure 4). Warm temperature  
104 ( $\geq 15^{\circ}\text{C}$ ) and low high humidity ( $\leq 50\%$ ) were able to reduce the risk of death compared to  
105 reference condition (i.e. temperature  $11^{\circ}\text{C}$ , relative humidity 62%). A negative relationship between  
106 the relative humidity and iCFR was observed at high humidity ( $>80\%$ ).

### 107 **References**

- 108 [1] Y. Wu, W. Jing, J. Liu, Q. Ma, J. Yuan, Y. Wang, M. Du, M. Liu, Effects of temperature and  
109 humidity on the daily new cases and new deaths of covid-19 in 166 countries, *Science of the*  
110 *Total Environment* (2020) 139051.
- 111 [2] S. W. P. Center, National oceanic and atmospheric administration, Seattle, Washington (2012).

- 112 [3] J. Liang, H.-Y. Yuan, L. Wu, D. U. Pfeiffer, Estimating effects of intervention measures on  
113 covid-19 outbreak in wuhan taking account of improving diagnostic capabilities using a mod-  
114 elling approach, *BMC infectious diseases* 21 (1) (2021) 1–10.
- 115 [4] A. J. Kucharski, T. W. Russell, C. Diamond, Y. Liu, J. Edmunds, S. Funk, R. M. Eggo,  
116 F. Sun, M. Jit, J. D. Munday, et al., Early dynamics of transmission and control of covid-19:  
117 a mathematical modelling study, *The lancet infectious diseases* 20 (5) (2020) 553–558.
- 118 [5] A. Vehtari, A. Gelman, J. Gabry, Efficient implementation of leave-one-out cross-validation  
119 and waic for evaluating fitted bayesian models, *arXiv preprint arXiv:1507.04544* (2015).
- 120 [6] S. Watanabe, A widely applicable bayesian information criterion, *Journal of Machine Learning*  
121 *Research* 14 (Mar) (2013) 867–897.
- 122 [7] O. Diekmann, J. A. P. Heesterbeek, J. A. Metz, On the definition and the computation of  
123 the basic reproduction ratio  $r_0$  in models for infectious diseases in heterogeneous populations,  
124 *Journal of mathematical biology* 28 (4) (1990) 365–382.
- 125 [8] O. Diekmann, J. Heesterbeek, M. G. Roberts, The construction of next-generation matrices for  
126 compartmental epidemic models, *Journal of the Royal Society Interface* 7 (47) (2010) 873–885.
- 127 [9] N. G. Davies, A. J. Kucharski, R. M. Eggo, A. Gimma, W. J. Edmunds, T. Jombart,  
128 K. O’Reilly, A. Endo, J. Hellewell, E. S. Nightingale, et al., Effects of non-pharmaceutical  
129 interventions on covid-19 cases, deaths, and demand for hospital services in the uk: a mod-  
130 elling study, *The Lancet Public Health* 5 (7) (2020) e375–e385.
- 131 [10] S. A. Lauer, K. H. Grantz, Q. Bi, F. K. Jones, Q. Zheng, H. R. Meredith, A. S. Azman, N. G.  
132 Reich, J. Lessler, The incubation period of coronavirus disease 2019 (covid-19) from publicly  
133 reported confirmed cases: estimation and application, *Annals of internal medicine* 172 (9)  
134 (2020) 577–582.
- 135 [11] R. Li, S. Pei, B. Chen, Y. Song, T. Zhang, W. Yang, J. Shaman, Substantial undocumented  
136 infection facilitates the rapid dissemination of novel coronavirus (sars-cov-2), *Science* 368 (6490)  
137 (2020) 489–493.
- 138 [12] C. Faes, S. Abrams, D. Van Beckhoven, G. Meyfroidt, E. Vlieghe, N. Hens, et al., Time between  
139 symptom onset, hospitalisation and recovery or death: Statistical analysis of belgian covid-19

140 patients, *International Journal of Environmental Research and Public Health* 17 (20) (2020)  
141 7560.

142 [13] J. H. Beigel, K. M. Tomashek, L. E. Dodd, A. K. Mehta, B. S. Zingman, A. C. Kalil,  
143 E. Hohmann, H. Y. Chu, A. Luetkemeyer, S. Kline, et al., Remdesivir for the treatment  
144 of covid-19—preliminary report, *The New England journal of medicine* (2020).

145 [14] S.-m. Jung, A. R. Akhmetzhanov, K. Hayashi, N. M. Linton, Y. Yang, B. Yuan, T. Kobayashi,  
146 R. Kinoshita, H. Nishiura, Real-time estimation of the risk of death from novel coronavirus  
147 (covid-19) infection: inference using exported cases, *Journal of clinical medicine* 9 (2) (2020)  
148 523.

149 [15] A. Gasparrini, Distributed lag linear and non-linear models in r: the package dlnm, *Journal of*  
150 *statistical software* 43 (8) (2011) 1.

151 Supplementary Figures

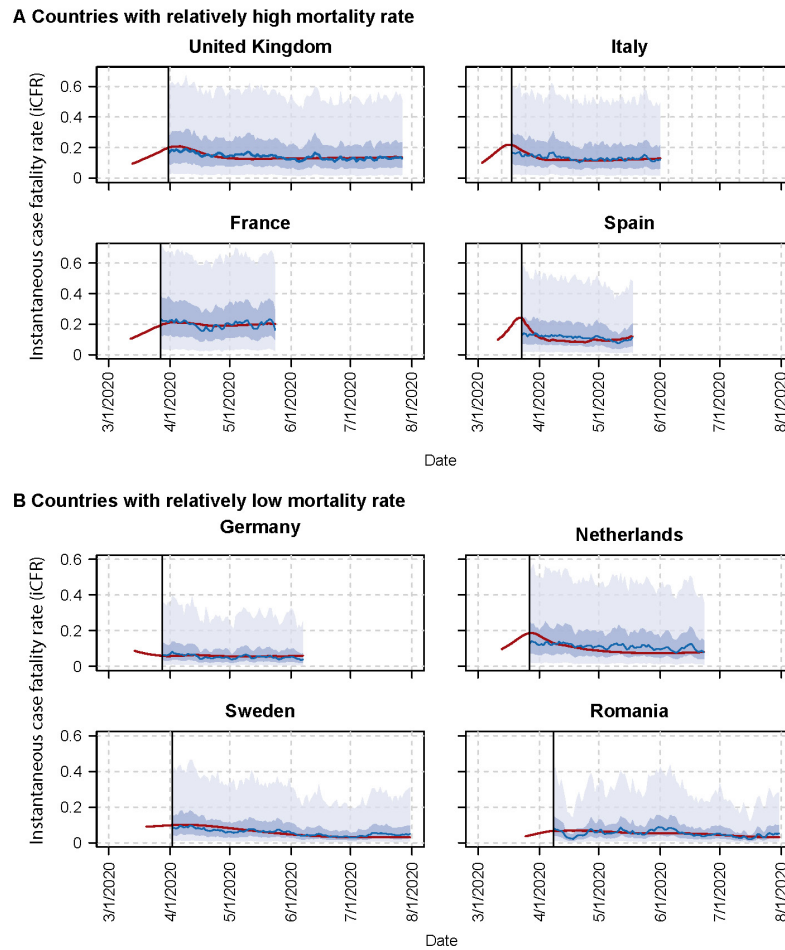

Supplementary Figure 1: Prediction for the iCFR based on DLNM models in the eight European countries during the community outbreaks. The red curves represent the iCFR calculated by SEIR models. The blue curves represent the mean prediction of iCFR based on DLNM models. The light blue and dark blue shaded areas respectively represent the 95% and 50% prediction intervals.

**A Temperature**

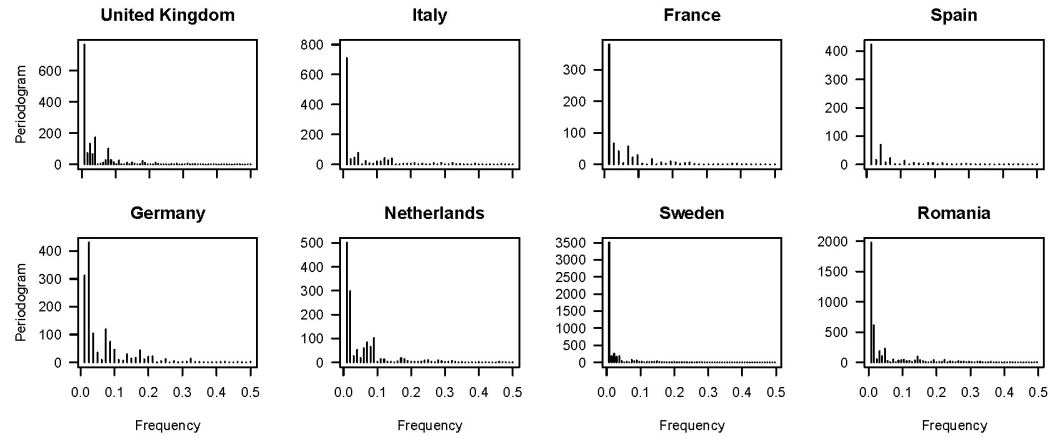

**B Relative humidity**

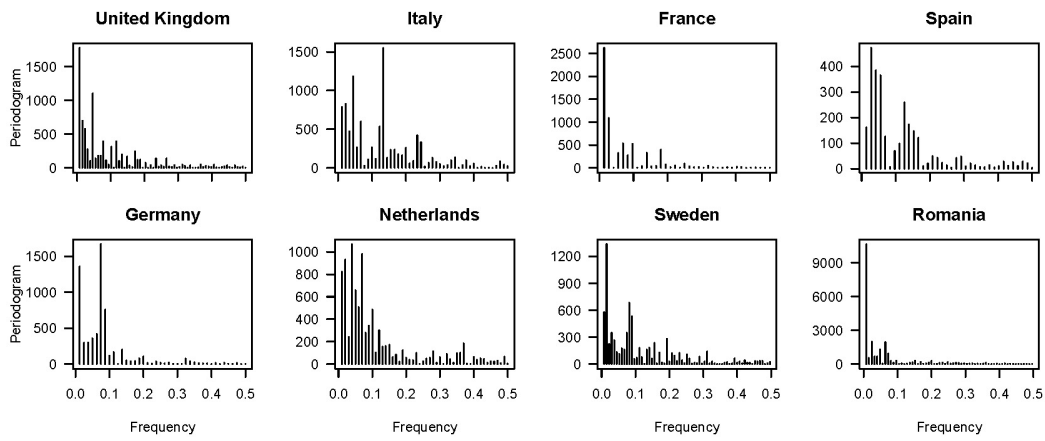

Supplementary Figure 2: Periodogram plot of daily temperature and relative humidity among the eight countries.



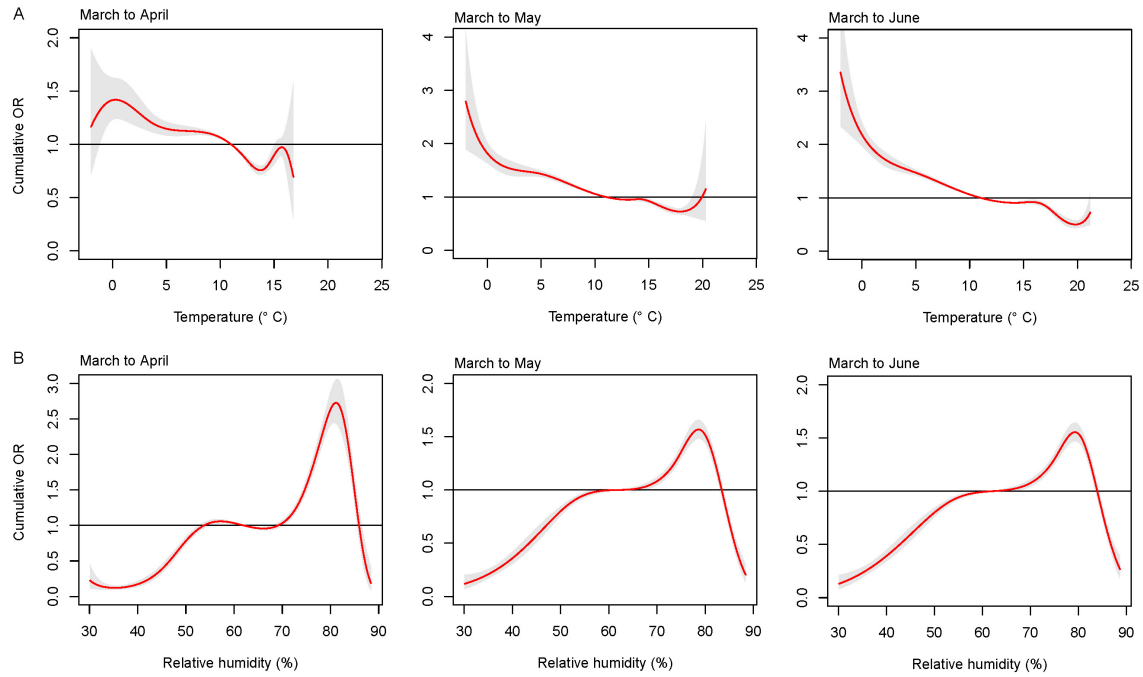

Supplementary Figure 3: The estimated cumulative effects of the temperature and relative humidity on fatality rates. The red lines are the mean ORs, and the grey shaded areas are the 95% credible intervals.

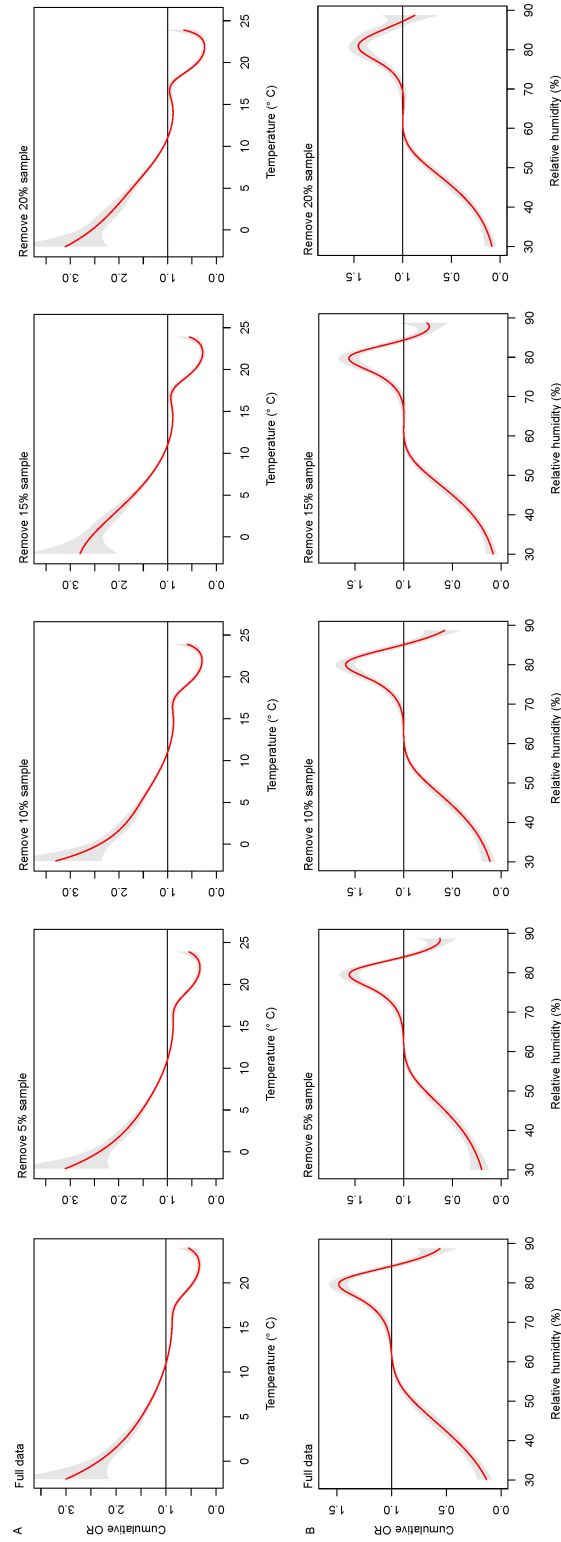

Supplementary Figure 4: The estimated cumulative effects of the temperature and the relative humidity on fatality rates using different training data sets.

Supplementary Table 1: Parameter estimates for the SEIR epidemic model. The mean values and 95% credible intervals of the posterior distribution of each of the parameters are included.  $\frac{1}{\eta}$  is the latent period,  $\frac{1}{\sigma}$  is the incubation period,  $\frac{1}{\rho}$  is the confirmation delay,  $\frac{1}{\varepsilon}$  is the recovery time for un-reported cases (mainly asymptomatic cases), and  $\frac{1}{\gamma}$  is the time from confirmation to recovery for hospital confirmed cases.  $\frac{1}{\varphi}$  is the infection outcome delay. Gelman-Rubin convergence (GR) test was performed. Convergence occurs when the value of GR is close to 1.

|                | $\frac{1}{\eta}$    |      | $\frac{1}{\sigma}$  |      | $\frac{1}{\rho}$    |      | $\frac{1}{\varepsilon}$ |      | $\frac{1}{\gamma}$     |      | WAIC                   |      |
|----------------|---------------------|------|---------------------|------|---------------------|------|-------------------------|------|------------------------|------|------------------------|------|
|                | Mean<br>(95% CI)    | GR   | Mean<br>(95% CI)    | GR   | Mean<br>(95% CI)    | GR   | Mean<br>(95% CI)        | GR   | Mean<br>(95% CI)       | GR   | Mean<br>(95% CI)       | GR   |
| United Kingdom | 2.39<br>(2.02,2.97) | 1.01 | 5.71<br>(4.96,6.54) | 1.00 | 4.03<br>(2.42,5.62) | 1.01 | 16.00<br>(15.83,16.22)  | 1.00 | 13.99<br>(13.78,14.14) | 1.06 | 7.92<br>(7.02,10.31)   | 1.00 |
| Italy          | 2.28<br>(2.01,2.87) | 1.00 | 5.60<br>(4.66,6.48) | 1.01 | 3.00<br>(2.04,4.74) | 1.00 | 16.01<br>(15.83,16.21)  | 1.00 | 13.98<br>(13.79,14.18) | 1.00 | 9.23<br>(7.09,12.98)   | 1.01 |
| France         | 2.27<br>(2.00,2.81) | 1.01 | 5.28<br>(4.64,6.55) | 1.25 | 2.82<br>(2.01,4.82) | 1.00 | 15.96<br>(15.78,16.13)  | 1.00 | 13.98<br>(13.82,14.25) | 1.03 | 9.00<br>(7.11,12.23)   | 1.04 |
| Spain          | 2.13<br>(2.01,2.46) | 2.44 | 5.35<br>(5.22,5.47) | 1.11 | 2.44<br>(2.02,3.30) | 1.09 | 15.98<br>(15.85,16.09)  | 1.00 | 14.04<br>(13.86,14.13) | 2.98 | 12.43<br>(10.51,13.59) | 1.13 |
| Germany        | 2.15<br>(2.00,2.60) | 1.14 | 5.47<br>(4.68,6.22) | 1.04 | 2.45<br>(2.01,3.57) | 1.00 | 15.98<br>(15.77,16.20)  | 1.10 | 14.01<br>(13.86,14.17) | 1.21 | 12.10<br>(8.92,13.93)  | 1.00 |
| Netherlands    | 2.56<br>(2.03,2.98) | 1.00 | 5.84<br>(4.95,6.67) | 1.01 | 5.42<br>(4.18,5.98) | 1.00 | 16.00<br>(15.79,16.18)  | 1.00 | 13.99<br>(13.81,14.19) | 1.00 | 9.84<br>(7.20,13.62)   | 1.00 |
| Sweden         | 2.60<br>(2.06,2.98) | 1.00 | 5.17<br>(4.23,6.12) | 1.01 | 3.72<br>(2.09,5.79) | 1.00 | 16.01<br>(15.82,16.21)  | 1.00 | 14.00<br>(13.79,14.21) | 1.00 | 10.33<br>(7.17,13.78)  | 1.01 |
| Romania        | 2.29<br>(2.01,2.86) | 1.00 | 5.09<br>(4.23,5.89) | 1.06 | 2.89<br>(2.02,4.63) | 1.00 | 16.01<br>(15.83,16.21)  | 1.00 | 13.99<br>(13.79,14.21) | 1.00 | 8.12<br>(7.02,10.83)   | 1.00 |

152 **Supplementary Tables**

Supplementary Table 2: Summary statistics of daily number of cases, and deaths per 1 million people in the eight European countries.

|                | Minimum | 25% | Median | 75% | Maximum |
|----------------|---------|-----|--------|-----|---------|
| <b>Cases</b>   |         |     |        |     |         |
| United Kingdom | 1       | 11  | 21     | 53  | 82      |
| Italy          | 5       | 14  | 38     | 66  | 109     |
| France         | 2       | 9   | 23     | 40  | 113     |
| Spain          | 5       | 25  | 63     | 105 | 196     |
| Germany        | 3       | 8   | 14     | 41  | 76      |
| Netherlands    | 4       | 10  | 16     | 47  | 77      |
| Sweden         | 10      | 38  | 55     | 73  | 282     |
| Romania        | 6       | 10  | 16     | 21  | 70      |
| <b>Deaths</b>  |         |     |        |     |         |
| United Kingdom | 0       | 1   | 3      | 8   | 18      |
| Italy          | 0       | 3   | 6      | 9   | 16      |
| France         | 0       | 2   | 4      | 8   | 30      |
| Spain          | 0       | 4   | 8      | 13  | 20      |
| Germany        | 0       | 0   | 1      | 2   | 4       |
| Netherlands    | 0       | 1   | 2      | 6   | 14      |
| Sweden         | 0       | 2   | 4      | 8   | 18      |
| Romania        | 0       | 1   | 1      | 1   | 2       |

Supplementary Table 3: Summary statistics of daily weather conditions in the eight European countries.

|                      | Minimum | 25%   | Median | 75%   | Maximum | Mean±SD     |
|----------------------|---------|-------|--------|-------|---------|-------------|
| Temperature (°C)     |         |       |        |       |         |             |
| United Kingdom       | 5.14    | 9.21  | 13.08  | 15.04 | 20.51   | 12.15±3.59  |
| Italy                | 5.33    | 10.78 | 13.93  | 16.4  | 20.34   | 13.36±3.63  |
| France               | 5.85    | 10.72 | 13.69  | 15.55 | 20.37   | 13.24±3.29  |
| Spain                | 7.13    | 11.35 | 13.44  | 14.6  | 19.73   | 13.19±2.84  |
| Germany              | 0.90    | 7.79  | 10.77  | 12.76 | 17.99   | 10.13±4.12  |
| Netherlands          | 4.33    | 8.2   | 11.28  | 14.19 | 18.72   | 11.39±3.91  |
| Sweden               | -2.07   | 4.81  | 10.38  | 14.52 | 20.99   | 9.56±5.95   |
| Romania              | 0.72    | 11.84 | 16.51  | 20.63 | 25.37   | 15.73±5.74  |
| Relative humidity(%) |         |       |        |       |         |             |
| United Kingdom       | 53.29   | 66.78 | 73.09  | 79.33 | 88.78   | 73.28±8.17  |
| Italy                | 34.89   | 55.66 | 63.46  | 72.04 | 88.42   | 64.12±10.92 |
| France               | 48.11   | 59.99 | 66.84  | 74.56 | 87.8    | 66.92±9.56  |
| Spain                | 62.63   | 68.56 | 75.35  | 79.56 | 86.38   | 74.66±6.47  |
| Germany              | 44.04   | 57.69 | 61.84  | 71.51 | 81.79   | 63.46±9.25  |
| Netherlands          | 48      | 64.71 | 70.83  | 77.66 | 88.22   | 70.39±9.48  |
| Sweden               | 52.62   | 62.21 | 67.35  | 74.59 | 85.68   | 68.36±7.9   |
| Romania              | 30.03   | 53.46 | 63.3   | 73.02 | 87.31   | 63.4±13.18  |

Supplementary Table 4: DLNM Model comparison based on different weather predictors.

| Model                                                                                                    | AIC     | BIC     | Loglik  |
|----------------------------------------------------------------------------------------------------------|---------|---------|---------|
| $\log\left(\frac{iCFR_t^i}{1-iCFR_t^i}\right) = \alpha + \alpha^i$                                       | 12857.2 | 12866.4 | -6426.6 |
| $\log\left(\frac{iCFR_t^i}{1-iCFR_t^i}\right) = \alpha + \alpha^i + \sum cb(Temp_t^i)$                   | 10519.2 | 10637.8 | -5233.6 |
| $\log\left(\frac{iCFR_t^i}{1-iCFR_t^i}\right) = \alpha + \alpha^i + \sum cb((RH_t^i))$                   | 11921.4 | 12040.0 | -5934.7 |
| $\log\left(\frac{iCFR_t^i}{1-iCFR_t^i}\right) = \alpha + \alpha^i + \sum cb(Temp_t^i) + \sum cb(RH_t^i)$ | 9738.3  | 9966.4  | -4819.1 |

Supplementary Table 5: The estimation of the fixed intercept and coefficients in DLNM coupled with a mixed-effect model . The variables of cb.temperaturev1.l1 to cb.humidityv6.l4 are generated by the cross basis functions in DLNM.

| Variable            | Estimate   | Std. Error | z value | P-value  |
|---------------------|------------|------------|---------|----------|
| Intercept           | -3.1699289 | 0.355785   | -8.91   | <0.001   |
| cb.temperaturev1.l1 | 0.1411383  | 0.1275635  | 1.106   | 0.268547 |
| cb.temperaturev1.l2 | -0.3438178 | 0.1099579  | -3.127  | 0.001767 |
| cb.temperaturev1.l3 | -0.0825041 | 0.1148768  | -0.718  | 0.472636 |
| cb.temperaturev1.l4 | 0.1213828  | 0.1081841  | 1.122   | 0.261862 |
| cb.temperaturev2.l1 | -0.2599674 | 0.0972192  | -2.674  | 0.007494 |
| cb.temperaturev2.l2 | 0.0471271  | 0.0769912  | 0.612   | 0.540465 |
| cb.temperaturev2.l3 | -0.0306237 | 0.0892278  | -0.343  | 0.731442 |
| cb.temperaturev2.l4 | -0.3038603 | 0.0877978  | -3.461  | <0.001   |
| cb.temperaturev3.l1 | -0.0106087 | 0.1064286  | -0.1    | 0.920599 |
| cb.temperaturev3.l2 | -0.0580889 | 0.0902724  | -0.643  | 0.519909 |
| cb.temperaturev3.l3 | -0.3593119 | 0.0966693  | -3.717  | <0.001   |
| cb.temperaturev3.l4 | -0.120484  | 0.0927389  | -1.299  | 0.193884 |
| cb.temperaturev4.l1 | 0.0056769  | 0.1081349  | 0.052   | 0.958132 |
| cb.temperaturev4.l2 | -0.0932972 | 0.0891686  | -1.046  | 0.295422 |
| cb.temperaturev4.l3 | -0.3942512 | 0.0948301  | -4.157  | <0.001   |
| cb.temperaturev4.l4 | 0.046028   | 0.0932205  | 0.494   | 0.62148  |
| cb.temperaturev5.l1 | 0.0921185  | 0.1746199  | 0.528   | 0.59782  |
| cb.temperaturev5.l2 | -0.0414536 | 0.1539405  | -0.269  | 0.787712 |
| cb.temperaturev5.l3 | -0.9669605 | 0.1395523  | -6.929  | <0.001   |
| cb.temperaturev5.l4 | -0.1748473 | 0.1354429  | -1.291  | 0.196728 |
| cb.temperaturev6.l1 | -0.0359648 | 0.2206378  | -0.163  | 0.870515 |
| cb.temperaturev6.l2 | 0.1178125  | 0.2095964  | 0.562   | 0.574053 |
| cb.temperaturev6.l3 | -0.5157761 | 0.1696462  | -3.04   | 0.002363 |
| cb.temperaturev6.l4 | -0.2525008 | 0.1463552  | -1.725  | 0.084481 |
| cb.humidityv1.l1    | -0.0760959 | 0.1415298  | -0.538  | 0.590807 |
| cb.humidityv1.l2    | 0.2974524  | 0.1564322  | 1.901   | 0.057239 |
| cb.humidityv1.l3    | 0.4239622  | 0.1249817  | 3.392   | <0.001   |
| cb.humidityv1.l4    | -0.3900315 | 0.1268123  | -3.076  | 0.0021   |
| cb.humidityv2.l1    | 0.2148096  | 0.095398   | 2.252   | 0.02434  |
| cb.humidityv2.l2    | 0.3397057  | 0.1095488  | 3.101   | 0.001929 |
| cb.humidityv2.l3    | 0.4692162  | 0.0831245  | 5.645   | <0.001   |
| cb.humidityv2.l4    | 0.0915356  | 0.0783017  | 1.169   | 0.242399 |
| cb.humidityv3.l1    | 0.0142524  | 0.114312   | 0.125   | 0.900777 |
| cb.humidityv3.l2    | 0.1509889  | 0.1272993  | 1.186   | 0.235585 |
| cb.humidityv3.l3    | 0.5810411  | 0.098065   | 5.925   | <0.001   |
| cb.humidityv3.l4    | -0.0502108 | 0.097828   | -0.513  | 0.607773 |
| cb.humidityv4.l1    | 0.2520897  | 0.1003122  | 2.513   | 0.011969 |
| cb.humidityv4.l2    | 0.3407618  | 0.1148536  | 2.967   | 0.003008 |
| cb.humidityv4.l3    | 0.5995064  | 0.0878938  | 6.821   | <0.001   |
| cb.humidityv4.l4    | -0.0240081 | 0.0868114  | -0.277  | 0.782122 |
| cb.humidityv5.l1    | -0.0465353 | 0.1176598  | -0.396  | 0.692469 |
| cb.humidityv5.l2    | 0.0943673  | 0.1310316  | 0.72    | 0.47141  |
| cb.humidityv5.l3    | 0.5635789  | 0.1014846  | 5.553   | <0.001   |
| cb.humidityv5.l4    | -0.0344524 | 0.0982732  | -0.351  | 0.725905 |
| cb.humidityv6.l1    | -0.0005845 | 0.1195719  | -0.005  | 0.9961   |
| cb.humidityv6.l2    | 0.3729215  | 0.1353168  | 2.756   | 0.005853 |
| cb.humidityv6.l3    | 0.2434892  | 0.1065491  | 2.285   | 0.022299 |
| cb.humidityv6.l4    | 0.1575367  | 0.1043284  | 1.51    | 0.131041 |

Supplementary Table 6: The estimated country-specific intercepts for each country for different selected months.

| Country        | March to April | March to May | March to June | Full data set (i.e March to July) |
|----------------|----------------|--------------|---------------|-----------------------------------|
| United Kingdom | -3.08±0.01     | -2.99±0.01   | -2.70±0.01    | -2.79±0.01                        |
| Italy          | -3.13±0.01     | -2.88±0.01   | -2.62±0.01    | -2.73±0.01                        |
| France         | -2.70±0.02     | -2.49±0.02   | -2.22±0.02    | -2.32±0.02                        |
| Spain          | -3.72±0.01     | -3.25±0.01   | -2.97±0.01    | -3.06±0.01                        |
| Germany        | -4.09±0.02     | -4.01±0.02   | -3.77±0.02    | -3.91±0.02                        |
| Netherlands    | -3.43±0.03     | -3.29±0.03   | -3.03±0.03    | -3.13±0.03                        |
| Sweden         | -3.86±0.05     | -3.97±0.04   | -3.83±0.03    | -4.00±0.03                        |
| Romania        | -3.19±0.09     | -3.45±0.06   | -3.26±0.05    | -3.43±0.04                        |

Supplementary Table 7: The country-level sample size (number of days sampled) for the mixed model.

| Country        | Sample size (day) |
|----------------|-------------------|
| United Kingdom | 127               |
| Italy          | 84                |
| France         | 67                |
| Spain          | 65                |
| Germany        | 80                |
| Netherlands    | 97                |
| Sweden         | 129               |
| Romania        | 125               |
